# Supplementary material
Source: publisher site journal article supplement (https://www.dovepress.com/article/483261)
Supplement: Supplementary file 1 [file get_supplementary_file.php]

**SERS analysis platform based on aptamer recognition-release strategy for efficient and sensitive diagnosis of colorectal precancerous lesions**

Fengsong Chen1†, Yanhua Huang1†, Yongxia Liu2, Yanwen Zhuang3, Xiaowei Cao3, Xiaogang Qin2*

1Department of Gastroenterology, Nantong Haimen People’s Hospital, Nantong 226100, Jiangsu, China

2Department of gastroenterology, Traditional Chinese Medicine Hospital of Tongzhou District, Nantong 226300, Jiangsu, China

3Institute of Translational Medicine, Medical College, Yangzhou University, Yangzhou 225001, Jiangsu, China

*Correspondence:

Xiaogang Qin， Email: tzqinxiaogang@163.com

Fengsong Chen and Yanhua Huang contributed equally to this work.

Information Classification: General

**
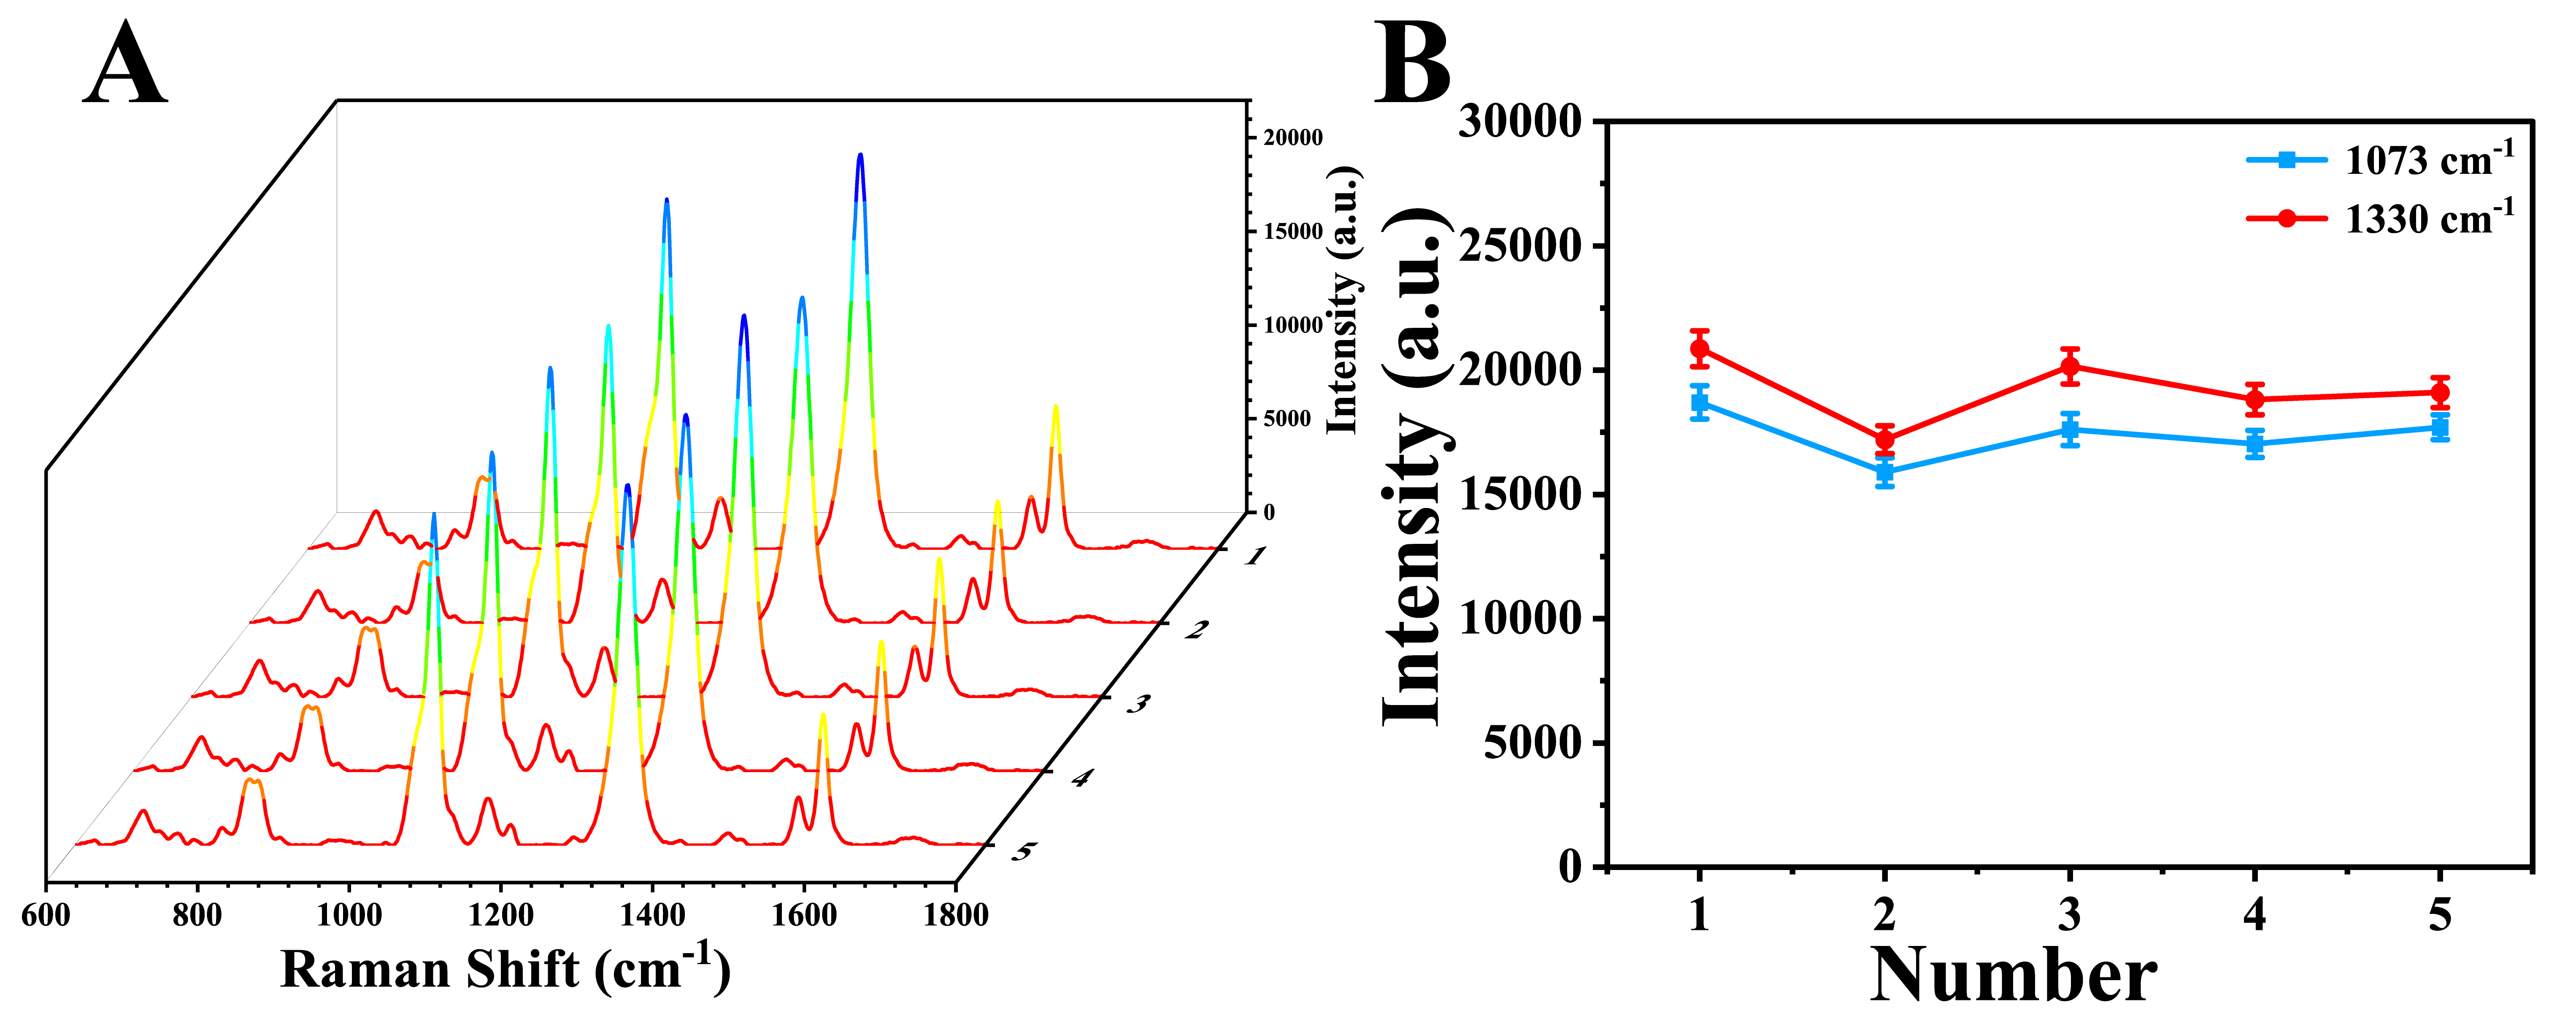
**

**Fig. S1** Microarray chip as the SERS analysis platform for performance evaluation: (A) repeatability assessment and (B) line graph corresponding to SERS intensity at 1073 cm-1 and 1330 cm-1.

**Table S1** Basic characteristics of the participants in this study.

| Groups | Health | Precancer | CRC | F/*X2* | *P* |
| --- | --- | --- | --- | --- | --- |
| Average age | 51±1.86 | 55±1.43 | 59±4.93 | 51.67 | p<0.0001 |
| Gender |  |  |  | 0.6183 | 0.2636 |
| Male | 16 | 18 | 15 |  |  |
| Female | 14 | 12 | 15 |  |  |
| number | 30 | 30 | 30 |  |  |

**Table S2.** The hnRNP A1 and S100P concentration detected by SERS using the proposed platform and ELISA in healthy people

| Samples | SERS (ng/mL) | | ELISA (ng/mL) | |
| --- | --- | --- | --- | --- |
| hnRNP A1 | S100P | hnRNP A1 | S100P |
| 1 | 36.82 | 15.97 | 37.04 | 16.61 |
| 2 | 42.91 | 17.92 | 39.77 | 18.04 |
| 3 | 35.55 | 14.46 | 39.07 | 15.37 |
| 4 | 37.15 | 15.91 | 40.42 | 17.16 |
| 5 | 38.39 | 15.87 | 39.71 | 16.31 |
| 6 | 37.51 | 17.92 | 39.57 | 18.48 |
| 7 | 42.05 | 16.31 | 44.92 | 18.81 |
| 8 | 41.25 | 15.17 | 39.09 | 17.08 |
| 9 | 42.19 | 14.79 | 45.20 | 16.05 |
| 10 | 37.58 | 15.51 | 39.77 | 16.01 |
| 11 | 42.41 | 15.75 | 45.50 | 14.72 |
| 12 | 37.94 | 15.74 | 39.45 | 15.20 |
| 13 | 41.09 | 15.91 | 39.87 | 16.03 |
| 14 | 37.55 | 14.79 | 40.71 | 14.03 |
| 15 | 42.06 | 16.02 | 39.17 | 15.34 |
| 16 | 38.24 | 16.17 | 41.27 | 15.87 |
| 17 | 36.42 | 15.04 | 39.26 | 17.20 |
| 18 | 42.75 | 17.76 | 44.81 | 18.08 |
| 19 | 40.51 | 16.04 | 38.79 | 17.14 |
| 20 | 37.48 | 15.34 | 42.12 | 17.89 |
| 21 | 38.24 | 16.07 | 41.04 | 17.17 |
| 22 | 38.16 | 15.67 | 39.92 | 16.93 |
| 23 | 36.72 | 15.05 | 39.91 | 16.15 |
| 24 | 36.97 | 17.91 | 40.04 | 19.23 |
| 25 | 38.71 | 15.50 | 40.21 | 16.78 |
| 26 | 41.75 | 15.07 | 42.31 | 17.28 |
| 27 | 40.73 | 15.60 | 43.02 | 17.94 |
| 28 | 36.72 | 18.17 | 39.17 | 19.09 |
| 29 | 37.28 | 16.95 | 41.04 | 17.75 |
| 30 | 39.75 | 17.15 | 40.91 | 18.35 |

**Table S3.** The hnRNP A1 and S100P concentration detected by SERS using the proposed platform and ELISA in CRC patients with precancerous lesions

| Samples | SERS (ng/mL) | | ELISA (ng/mL) | |
| --- | --- | --- | --- | --- |
| hnRNP A1 | S100P | hnRNP A1 | S100P |
| 1 | 61.92 | 41.62 | 64.07 | 42.09 |
| 2 | 58.37 | 37.71 | 61.05 | 41.02 |
| 3 | 62.19 | 41.06 | 65.72 | 42.79 |
| 4 | 63.05 | 42.03 | 64.74 | 44.27 |
| 5 | 59.71 | 39.74 | 62.82 | 39.97 |
| 6 | 55.97 | 41.06 | 56.79 | 42.19 |
| 7 | 59.29 | 39.51 | 64.01 | 41.49 |
| 8 | 62.32 | 41.07 | 65.17 | 43.68 |
| 9 | 58.74 | 38.75 | 64.28 | 40.79 |
| 10 | 65.08 | 38.75 | 68.09 | 41.44 |
| 11 | 56.75 | 40.72 | 62.43 | 42.07 |
| 12 | 63.28 | 38.84 | 65.91 | 41.19 |
| 13 | 59.79 | 37.92 | 64.55 | 39.93 |
| 14 | 60.28 | 42.72 | 65.02 | 44.49 |
| 15 | 60.02 | 37.91 | 64.29 | 39.47 |
| 16 | 61.37 | 36.16 | 60.77 | 39.09 |
| 17 | 55.92 | 41.04 | 60.58 | 43.45 |
| 18 | 61.82 | 41.78 | 58.87 | 42.47 |
| 19 | 57.39 | 39.57 | 59.92 | 42.19 |
| 20 | 61.72 | 42.14 | 64.76 | 44.59 |
| 21 | 58.53 | 36.96 | 61.50 | 38.27 |
| 22 | 61.97 | 41.72 | 65.07 | 42.59 |
| 23 | 57.99 | 40.50 | 60.73 | 42.72 |
| 24 | 65.07 | 39.72 | 67.03 | 41.49 |
| 25 | 59.60 | 42.05 | 64.03 | 43.83 |
| 26 | 62.57 | 36.79 | 65.08 | 39.49 |
| 27 | 62.81 | 41.21 | 64.24 | 42.29 |
| 28 | 55.02 | 37.29 | 60.29 | 38.75 |
| 29 | 61.22 | 36.97 | 64.05 | 39.07 |
| 30 | 57.93 | 38.76 | 60.04 | 40.50 |

**Table S4.** The hnRNP A1 and S100P concentration detected by SERS using the proposed platform and ELISA in colorectal cancer patients

| Samples | SERS (ng/mL) | | ELISA (ng/mL) | |
| --- | --- | --- | --- | --- |
| hnRNP A1 | S100P | hnRNP A1 | S100P |
| 1 | 115.42 | 61.19 | 113.19 | 59.27 |
| 2 | 118.34 | 57.50 | 129.07 | 64.94 |
| 3 | 122.19 | 60.83 | 118.19 | 55.16 |
| 4 | 103.75 | 62.75 | 109.72 | 64.38 |
| 5 | 114.29 | 55.93 | 124.37 | 59.28 |
| 6 | 109.70 | 64.17 | 124.34 | 69.42 |
| 7 | 107.76 | 59.49 | 116.86 | 61.94 |
| 8 | 112.75 | 61.72 | 120.40 | 65.25 |
| 9 | 118.49 | 56.04 | 116.53 | 58.48 |
| 10 | 105.04 | 58.67 | 114.04 | 62.67 |
| 11 | 116.17 | 60.27 | 124.19 | 64.72 |
| 12 | 123.57 | 58.73 | 119.36 | 62.70 |
| 13 | 107.81 | 59.91 | 114.19 | 62.42 |
| 14 | 110.07 | 63.47 | 117.10 | 67.41 |
| 15 | 120.27 | 57.49 | 127.45 | 61.61 |
| 16 | 111.75 | 55.66 | 114.43 | 59.56 |
| 17 | 115.09 | 61.09 | 118.34 | 65.28 |
| 18 | 110.71 | 61.80 | 118.49 | 65.79 |
| 19 | 107.59 | 59.46 | 109.69 | 62.49 |
| 20 | 111.68 | 62.94 | 117.50 | 67.66 |
| 21 | 128.09 | 57.37 | 134.72 | 61.02 |
| 22 | 121.57 | 61.50 | 124.51 | 65.46 |
| 23 | 107.49 | 62.44 | 115.72 | 65.17 |
| 24 | 105.88 | 59.73 | 111.49 | 64.42 |
| 25 | 109.14 | 62.72 | 115.94 | 65.10 |
| 26 | 112.40 | 66.19 | 115.94 | 68.95 |
| 27 | 102.73 | 66.17 | 114.46 | 70.19 |
| 28 | 105.83 | 57.29 | 114.74 | 60.07 |
| 29 | 111.29 | 55.79 | 119.73 | 58.71 |
| 30 | 105.27 | 59.73 | 107.41 | 64.49 |
